# 1 Interfacing Spinal Motor Units in Non-Human Primates 2 Identifies a Principal Neural Component for Force Control 3 Constrained by the Size Principle 4

5 Alessandro Del Vecchio<sup>1\*§</sup>, Rachael H. A. Jones<sup>2\*</sup>, Ian S. Schofield<sup>2</sup>, Thomas M Kinfe<sup>3</sup>,  
6 Jaime Ibáñez<sup>4,5,6</sup>, Dario Farina<sup>4†§</sup> and Stuart N. Baker<sup>2†§</sup>

7  
8 1: Department Artificial Intelligence in Biomedical Engineering, Friedrich-Alexander University  
9 (FAU), Erlangen-Nuremberg, Erlangen, Germany.

10 2: Medical Faculty, Newcastle University, Newcastle upon Tyne, UK

11 3: Division of Functional Neurosurgery and Stereotaxy, Friedrich-Alexander University (FAU),  
12 Erlangen-Nuremberg, Erlangen, Germany.

13 4: Department of Bioengineering, Imperial College London, London, UK

14 5: Institute of Neurology, University College London, London, UK

15 6: BSICoS Group, Instituto de Investigación Sanitaria Aragón (IIS Aragón), Zaragoza, Spain

16  
17 \*: equal contribution

18 †: equal senior author contribution  
19

20 §Corresponding authors: [alessandro.del.vecchio@fau.de](mailto:alessandro.del.vecchio@fau.de); [d.farina@imperial.ac.uk](mailto:d.farina@imperial.ac.uk);  
21 [stuart.baker@ncl.ac.uk](mailto:stuart.baker@ncl.ac.uk)

22 Prof. Alessandro Del Vecchio, Department Artificial Intelligence in Biomedical Engineering, Medical  
23 Valley, Henkestraße 91, Friedrich-Alexander University, Erlangen-Nuremberg, Erlangen, 91052,  
24 Germany.

25 Prof. Dario Farina, Michael Uren Building, White City Campus, Department of Bioengineering,  
26 Imperial College London, London, UK

27 Prof. Stuart Baker, Henry Wellcome Building, Medical Faculty, Newcastle University, Newcastle  
28 upon Tyne, NE2 4HH, UK.

29  
30  
31  
32 Running title: Motor unit behaviour in macaques

33 Key words: motoneurons, recruitment, discharge rate, common drive  
34  
35  
36

## 37 **ABSTRACT**

38 Motor units convert the last neural code of movement into muscle forces. The classic view of motor  
39 unit control is that the central nervous system sends common synaptic inputs to motoneuron pools and  
40 that motoneurons respond in an orderly fashion dictated by the size principle. This view however is in  
41 contrast with the large number of dimensions observed in motor cortex which may allow individual and  
42 flexible control of motor units. Evidence for flexible control of motor units may be obtained by tracking  
43 motor units longitudinally during the performance of tasks with some level of behavioural variability.  
44 Here we identified and tracked populations of motor units in the brachioradialis muscle of two macaque  
45 monkeys during ten sessions spanning over one month during high force isometric contractions with a  
46 broad range of rate of force development ( $1.8 - 38.6 \text{ N}\cdot\text{m}\cdot\text{s}^{-1}$ ). During the same sessions we recorded  
47 intramuscular EMG signals from 16 arm muscles of both limbs and elicited the full recruitment through  
48 neural stimulation of the median and deep radial nerves. We found a very stable recruitment order and  
49 discharge characteristics of the motor units over sessions and contraction trials. The small deviations  
50 from orderly recruitment were observed between motor units with close recruitment thresholds, and  
51 only during high rate of force development. Moreover, we also found that one component explained  
52 more than ~50% of the motor unit discharge rate variance, and that the remaining components could be  
53 described as a time-shifted version of the first, as it could be predicted from the interplay between the  
54 size principle of recruitment and one common input. In conclusion, our results show that motoneurons  
55 recruitment is determined by the interplay of the size principle and common input and that this  
56 recruitment scheme is not violated over time nor by the speed of the contractions.

## 57 **INTRODUCTION**

58 Theories of motor control are grounded on recording spinal motor unit activity during voluntary force  
59 contractions (1–4). Accurate understanding of motor unit function reveals in a direct way the strategies  
60 used by the nervous system to control and coordinate muscle forces (4). Generation of force is believed  
61 to occur by a combination of recruitment and rate coding of spinal motor neurons. While it is often  
62 assumed that recruitment order and rate coding are determined by the size principle (5, 6) and the  
63 common inputs that the motor neurons in a pool receive (2), some studies have challenged this view by  
64 proposing a more flexible motor unit control (7–9). Although previous evidence supports the size  
65 principle during isometric contractions (10, 11), these results have been challenged by the possibility  
66 that the motor cortex could provide independent input to spinal motoneurons. Moreover, it is still  
67 unclear if the high correlations in motor unit output (2, 12–14) have a functional origin or represent a  
68 physiological epiphenomenon.

69 The current lack of definitive evidence for size principle and common input during recruitment with  
70 force modulation is due to technical limitations. Accurate measures of the recruitment order and  
71 common input necessitate multiple recordings from as many units as possible and the tracking of the  
72 same motor units across different days and across rates of muscle force development (4, 7, 8, 10, 11,  
73 15–18). Currently, no studies tracked the same population of motor units in longitudinal experiments  
74 during natural tasks in non-human primates. Such tracking of the same population of neurons is crucial  
75 to infer functional behaviour. This is even more important when testing intrinsic properties of  
76 motoneurons, such as those associated with the size principle. One way to identify motor unit activity  
77 during natural tasks is to insert percutaneous wire electrodes into muscles. However, these electrodes  
78 may yield limited signal quality and limited number of detected motor units.

79 By tracking the behaviour of the same motor neurons across multiple experimental sessions with a new  
80 non-invasive neural interface consisting of high-density grids of electrodes placed on the muscle, we  
81 investigated for the first time the variability in motoneuron recruitment and discharge characteristics  
82 over a period of one month in two monkeys during natural contractions. The tracking of a relatively  
83 large population of spinal motor units during contractions at different rates of force development  
84 allowed us to define the neural strategies accomplished by the central nervous system to control muscle  
85 force. Moreover, it was possible to investigate the associations between recruitment of motoneurons  
86 and estimates of common synaptic inputs.

87 We found a very small day-to-day and trial-to-trial variability in recruitment order and rate coding,  
88 suggesting consistent control of the population of motoneuron ensembles. Moreover, with a  
89 factorization method we demonstrated that one common input component was sufficient to explain  
90 motor unit recruitment. The application of this approach in a primate species with a motor system  
91 closely similar to humans opens the future possibility of combining multiple single motor unit  
92 measurements with invasive recordings from central pathways. This has the potential to yield  
93 substantial new insights into the anatomical source of common drive during different motor tasks.

## 94 **RESULTS**

### 95 **Motor unit decomposition and tracking**

96 We describe the strategies of control of macaque motor units and evaluate the performance of a new  
97 non-invasive neural interface framework to monitor the changes in the number and properties of  
98 longitudinally tracked units over 10 experimental days (gathered over one month) in two animals.

99 We decomposed spike trains of individual motor units from high-density EMG signals using blind  
100 source separation techniques (Figure 1A; see details in Methods). After this process, the spike trains  
101 belonging to each decomposed motor unit were used to estimate the average 2D waveform of the  
102 corresponding action potentials (Figure 1A shows one column of the recording grid). The motor unit  
103 waveforms were used to track the same motor unit with a 2D cross-correlation function (19, 20). Figure  
104 1B shows the raster plot of all motor units across the ten days for Monkey MI. The y-axis in Figure 1B  
105 shows the total number of identified motoneurons across days (color-coded). The central panel of Figure  
106 1B shows an example of force signal and raster plot of the motor units during a contraction.

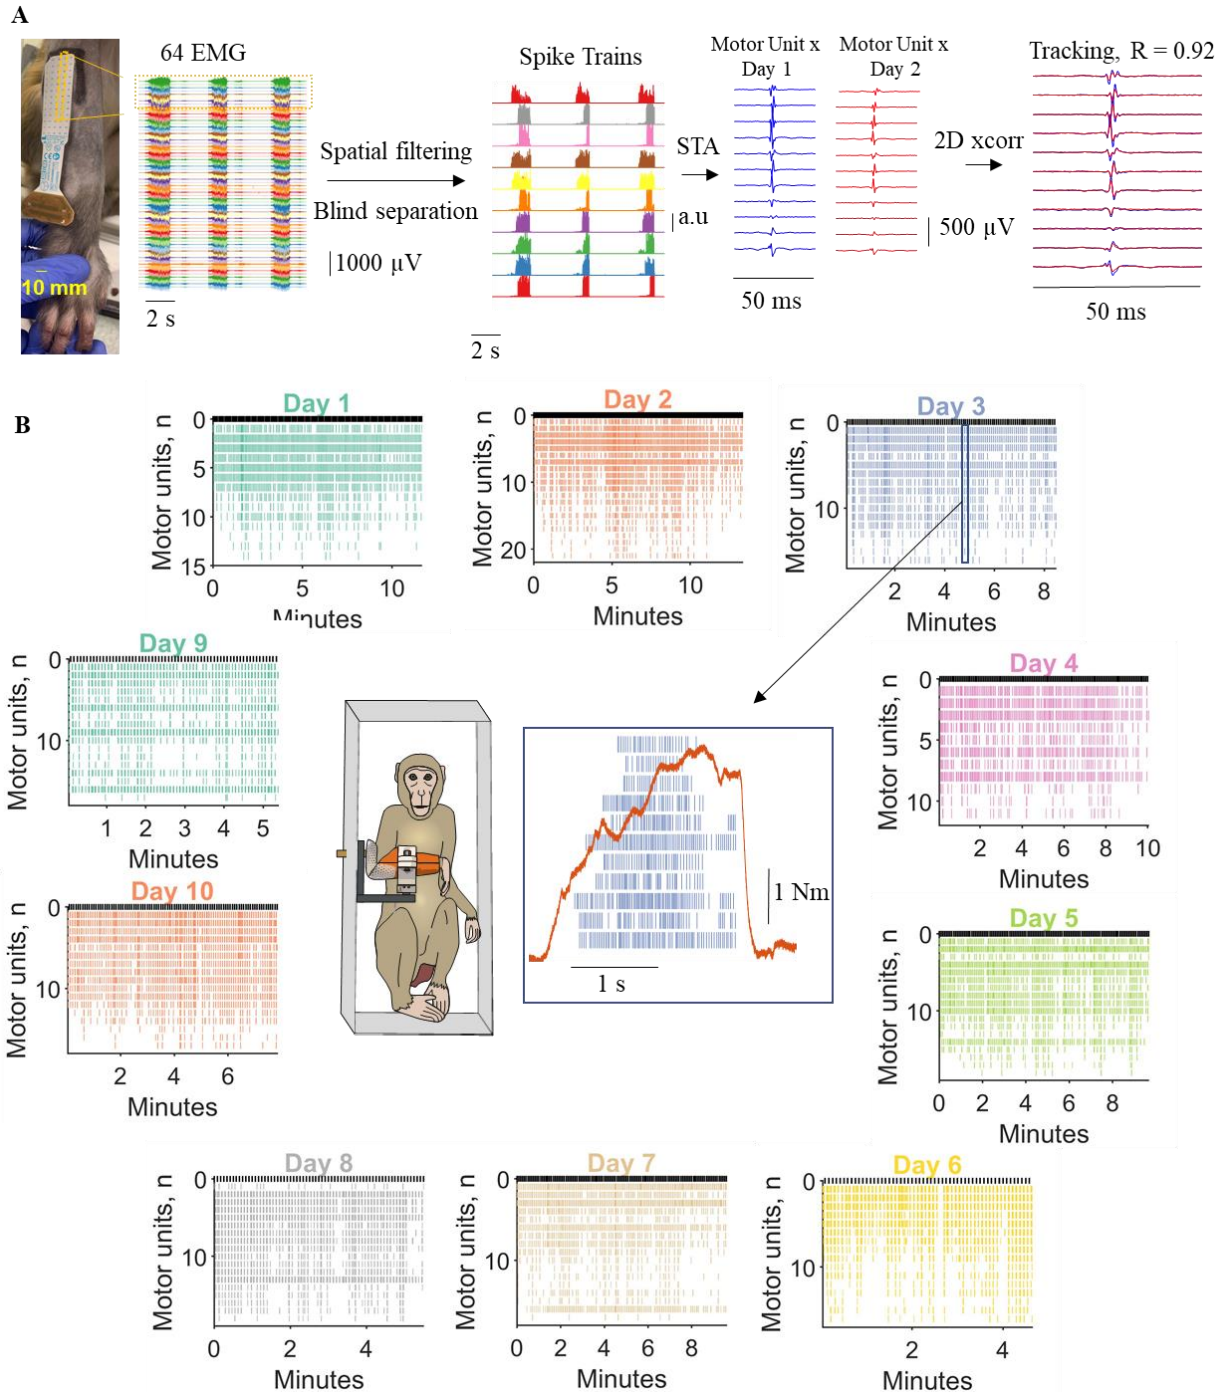

107

108 **Figure 1.** Motor unit decomposition in awake behaving macaques, experimental framework and analysis. **A.** From  
 109 left to right, sixty-four monopolar EMG signals during three individual contractions. Each contraction lasted  
 110 approximately 2 seconds. The monopolar EMG signals were spatially filtered with a double-differential  
 111 derivation. After this process, blind source separation identified the spike trains belonging to individual motor  
 112 units. The spike trains for each motor unit were used to spike trigger the average 2D motor unit waveform. The  
 113 2D motor unit waveforms were used for the longitudinal tracking, through a 2D cross correlation function. **B.**  
 114 Monkey 1 (MI) individual motoneuron spike trains across the 10 days (colour coded). Note that during the  
 115 different days we identified a relatively similar number of motor units. The centre of the figure shows the  
 116 experimental setup and an individual voluntary contraction (force signal in red) extracted from Day 3. \*STA =  
 117 Spike-triggered average.

118 On average, each recording session (one per day, ten days in total) lasted  $9.8 \pm 2.5$  min (Monkey MI)  
 119 and  $8.6 \pm 2.8$  min (Monkey MA). During these sessions, the monkeys performed on average  $118.0 \pm$   
 120  $30.1$  (MI) and  $103.5 \pm 33.9$  (MA) contractions, that were used for the subsequent EMG analyses. The

121 monkeys were instructed to reach a target without a specific training on the rate of force development.  
122 Therefore, we obtained a relatively large variance in rate of force development and motor unit  
123 recruitment speeds across contractions. During these contractions the rate of force development ranged  
124 widely, with an average and standard deviation of  $6.44 \pm 4.00 \text{ N}\cdot\text{m}\cdot\text{s}^{-1}$  (range 1.86 – 38.66  $\text{N}\cdot\text{m}\cdot\text{s}^{-1}$ ).  
125 Moreover, the peak force obtained across days also showed high variability, spanning two-fold  
126 maximum EMG amplitudes.

127 We identified a total of 389 motor units (192 MI and 197 for MA) in the individual recordings. Of these,  
128 only a subset (Figure 2) could be tracked and reliably matched with a unit from one or more different  
129 days on the basis of a two-dimensional correlation coefficients  $R > 0.7$  (see details in Methods). The  
130 average number of identified motor units for each experimental session was  $19.2 \pm 2.97$  and  $19.7 \pm 2.4$   
131 (mean and standard deviation), for MI and MA respectively. We were able to track on average  $9.07 \pm$   
132  $1.06$  and  $8.13 \pm 2.08$  motor units across all 10 days. Figure 2 shows the total number of identified motor  
133 units at each day and the number of tracked motor units across sessions, for the two monkeys. The upper  
134 panel of Figure 2 shows examples of 2D and 3D motor unit waveforms as well as the total number of  
135 motor units across contractions and days (bottom panels F-I). Figure 2F-I depicts the total number of  
136 motor units decomposed on each day for both monkeys. The right panels (Fig. 2G-I) show the individual  
137 motor units that were tracked across the different days (all possible combinations). Note that the largest  
138 number of units in these bar plots correspond to the units recorded during the examined day, which are  
139 highlighted with a black edged bar (Fig 2G and 2I). The number of the tracked units across days was  
140 lower than the total number of identified motoneurons (on average 19.45 vs. 8.60) because small  
141 changes in the proportion of recruited motor units challenge the tracking procedure. We previously  
142 obtained a very similar result in humans (20) due to different target forces and day-to-day variability.

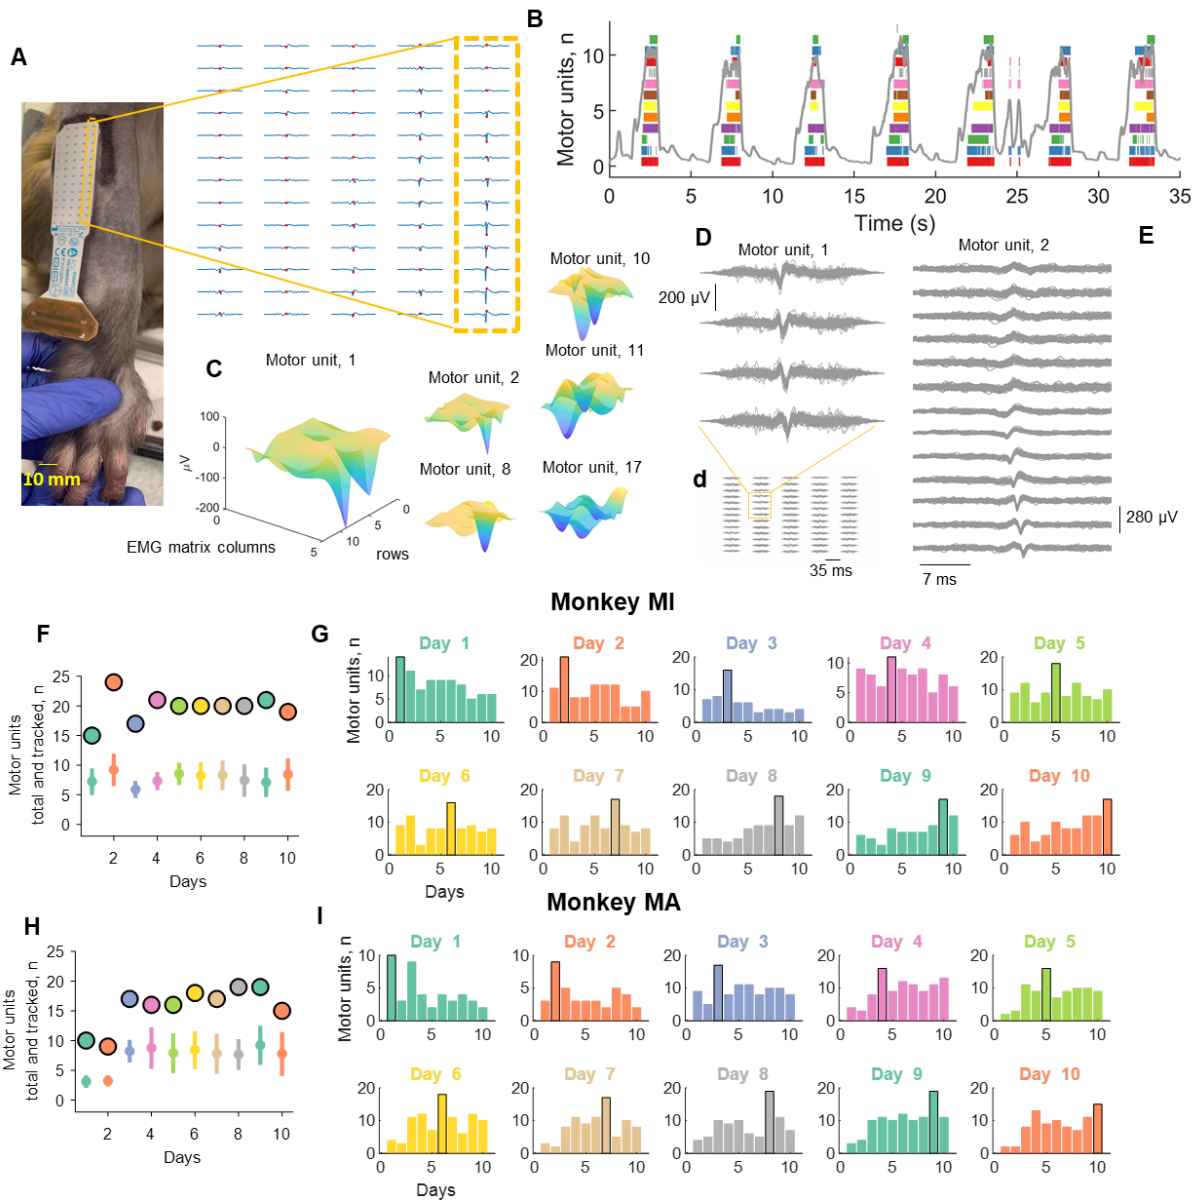

143

144 **Figure 2.** Motor unit action potentials and total numbers of identified and tracked motor units across the 10 days  
 145 (color-coded). **A.** Two-dimensional motor unit action potential propagating under the high-density EMG electrode  
 146 array. The highlighted yellow inset shows the respective column and row of the high-density EMG matrix during  
 147 the experiment. **B.** Raster plot of 12 identified motor units (color-coded) for seven representative contractions. **C.**  
 148 Three-dimensional representation of the motor unit action potential in a specific time instant (highlighted with a  
 149 red dot in A). Note that each action potential has a unique 3D signature which allows the independent component  
 150 analysis to converge to the time-series of discharge timings of the motor unit. **D.** Shimmer plots for two action  
 151 potential waveforms. Each action potential was averaged across an individual contraction and then superimposed  
 152 across all contractions for a specific day. Note the high similarity across channels for two representative motor  
 153 units. **F.** The total number of identified motor units across the 10 days (black edge circles) and tracked motor  
 154 units (open circles with vertical line depicting the standard deviation) for monkey MI and for MA (**H**). **G-I.** Bar  
 155 plot of the number of motor units that were successfully tracked across the 10 days (color-coded). Note that the  
 156 black edged bar plot corresponds to the number of motor units that were identified at the respective day and used  
 157 for tracking those motor units in the other days.

158 Despite the number of tracked motor units being lower than the number of identified motor units, the  
 159 discharge characteristics of the tracked motor units was highly correlated across sessions over the full  
 160 duration of the experiments (~1 month), as described in the following section.

161 **Motor unit identification validity**

162 The motor unit action potential similarity across sessions was assessed with the two-dimensional (2D)  
163 cross-correlation function (see details in Methods). Because the motor unit action potential waveform  
164 and motor unit discharge characteristics are independent, we first computed quality measures of  
165 decomposition based on the action potential waveform, and successively we computed correlation  
166 measures between the tracked motor units firing characteristics (discharge rate and recruitment  
167 threshold across days).

168 The consistency of each motor unit action potential that was accepted to belong to the same cluster, was  
169 very high (Silhouette measure averaged across all the identified motor units and the 10 days,  $0.91 \pm$   
170  $0.01$  and  $0.92 \pm 0.01$ , for MI and MA respectively). Silhouette measures above 0.9 have been associated  
171 with highly accurate decomposition with respect to intramuscular EMG signals (21). Moreover, the  
172 tracked units across sessions exhibited very high 2D correlation coefficients of the motor unit waveform  
173 ( $>0.7$  for the tracked units) and similar discharge rates across the different days. Figure 2D shows the  
174 action potentials that were spike-trigger averaged across the individual contractions (all the action  
175 potentials for a representative contraction were used to generate the motor unit action potential  
176 waveform, across all 64 channels). The variability in the action potential waveforms across contractions  
177 for the same day were minimal, with action potentials 2D correlation values always above 0.9. This  
178 indicates very high reliability in identifying the same motor unit across contractions.

### 179 **Physiological characteristics of macaque motor units**

180 Figure 3 shows the discharge characteristics of the tracked motor units across and between days. The  
181 inter-day motor unit discharge rate variability was very low, at 3.51 and 5.41 % for MI and MA  
182 respectively. For Monkey MI, the bivariate Pearson correlation coefficients between the average  
183 discharge rate across the different days were significant in all cases ( $P < 0.001$  after Bonferroni  
184 correction, Fig.3A-B). Indeed, the absolute differences in discharge rate across the units over the  
185 different days (Fig. 3C) was very low ( $0.14 \pm 3.45$  spikes/s). For Monkey MA, the results were similar,  
186 although with a smaller number of reliably decomposed motor units during the first two days (Fig. 2B),  
187 that resulted in poorer tracking performance during those two days (Fig 3. D-E). However, the lower  
188 number of motor units did not change the performance of the tracking algorithm and discharge  
189 characteristics of the units. There was a very small variability in discharge rate of the tracked units and  
190 corresponded to  $0.09 \pm 3.12$  spikes/s, with an average discharge rate across the ten days for all the  
191 identified motor units of  $41.77 \pm 1.46$  and  $38.42 \pm 2.07$  (spikes/s), for MI and MA respectively.

192

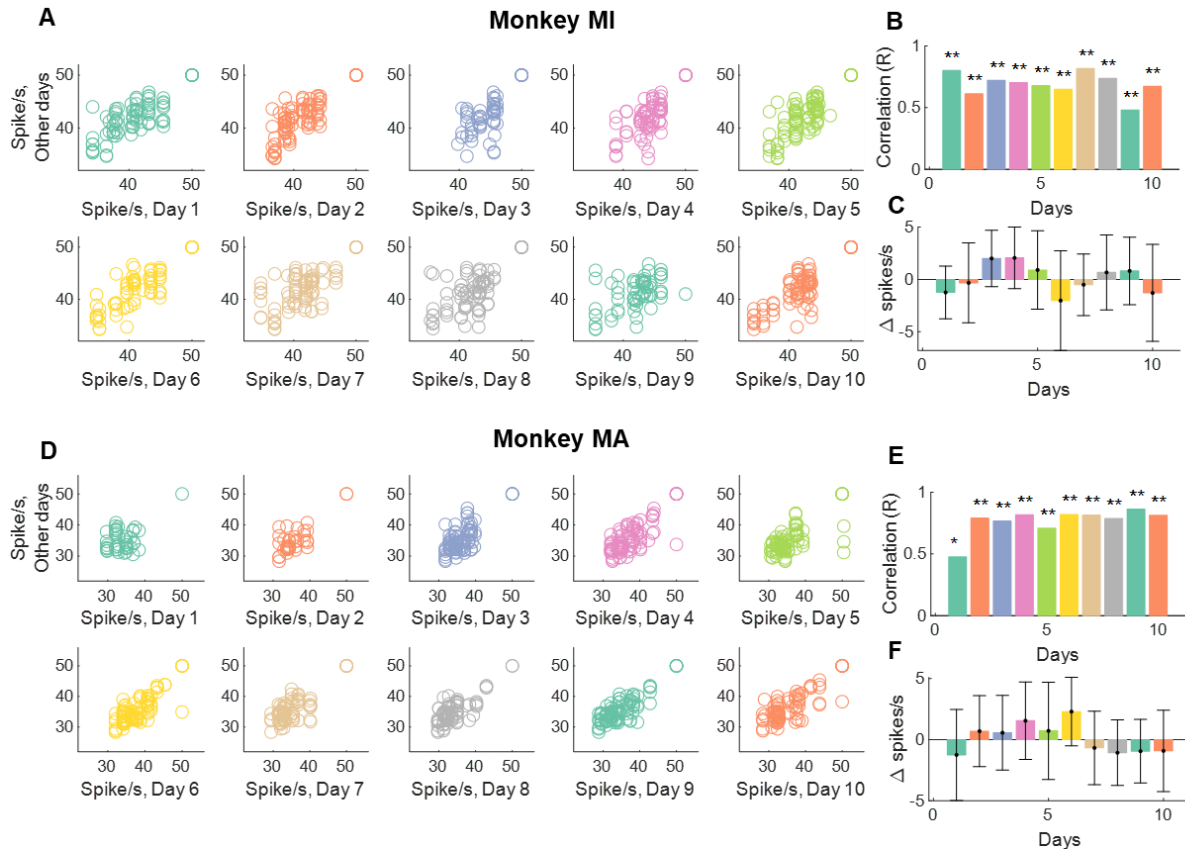

193

194 **Figure 3.** Motor unit discharge characteristics for the tracked motor units. **A.** The average instantaneous motor  
 195 unit discharge rate was plotted for all tracked motor units at any given day. Note that some motor units may show  
 196 different discharge rates because of changes in synaptic input. The day-to-day variability was very low (< 6 %)  
 197 and this low variability is demonstrated by very high correlation values (**B**) for the tracked motor units. **C.** The  
 198 absolute variability in discharge rate of the tracked motor units (i.e., the average motor unit discharge rate at day  
 199 1 minus the discharge rate of the same motor unit in the other days). Note that this correlation can only be  
 200 significant if the motor units are tracked successfully, since the motor unit discharge rate shows high variability  
 201 across the different units (see the figures below). **D-F.** The same plots as in **A-C** for Monkey (MA). \* $P < 0.01$ ,  
 202 \*\* $P < 0.001$

203 Previous evidence showed that motoneurons are recruited according to the size principle (5). This  
 204 implies that for a given synaptic input, motoneurons are recruited according to intrinsic properties (2).  
 205 However, some current and previous studies suggests a flexible control of spinal motor units in the  
 206 mammalian nervous system (7, 8), so that a strict recruitment order is seen as a special case of a flexible  
 207 control. According to this view, it is conceivable that variability in recruitment may occur over multiple  
 208 experimental sessions where the monkeys are instructed to reach a target force level according to a  
 209 broad range of contraction speeds. Contrary to this idea, we found a consistent recruitment order of  
 210 motor units that was maintained across contractions and days (Figure 5). The recruitment order across  
 211 the 10 experimental sessions was occasionally violated for motor units with very close recruitment  
 212 thresholds (Fig. 5A-D). In these cases, the occasional reversals of recruitment order were highly  
 213 correlated with the speed of recruitment (and therefore with the rate of force development) (Fig. 5C).  
 214 With very fast recruitment, the difference in threshold between motor units with close recruitment  
 215 threshold compresses to very small values so that the variability in synaptic input may likely explain  
 216 the occasional reversals (that happened in a small range).



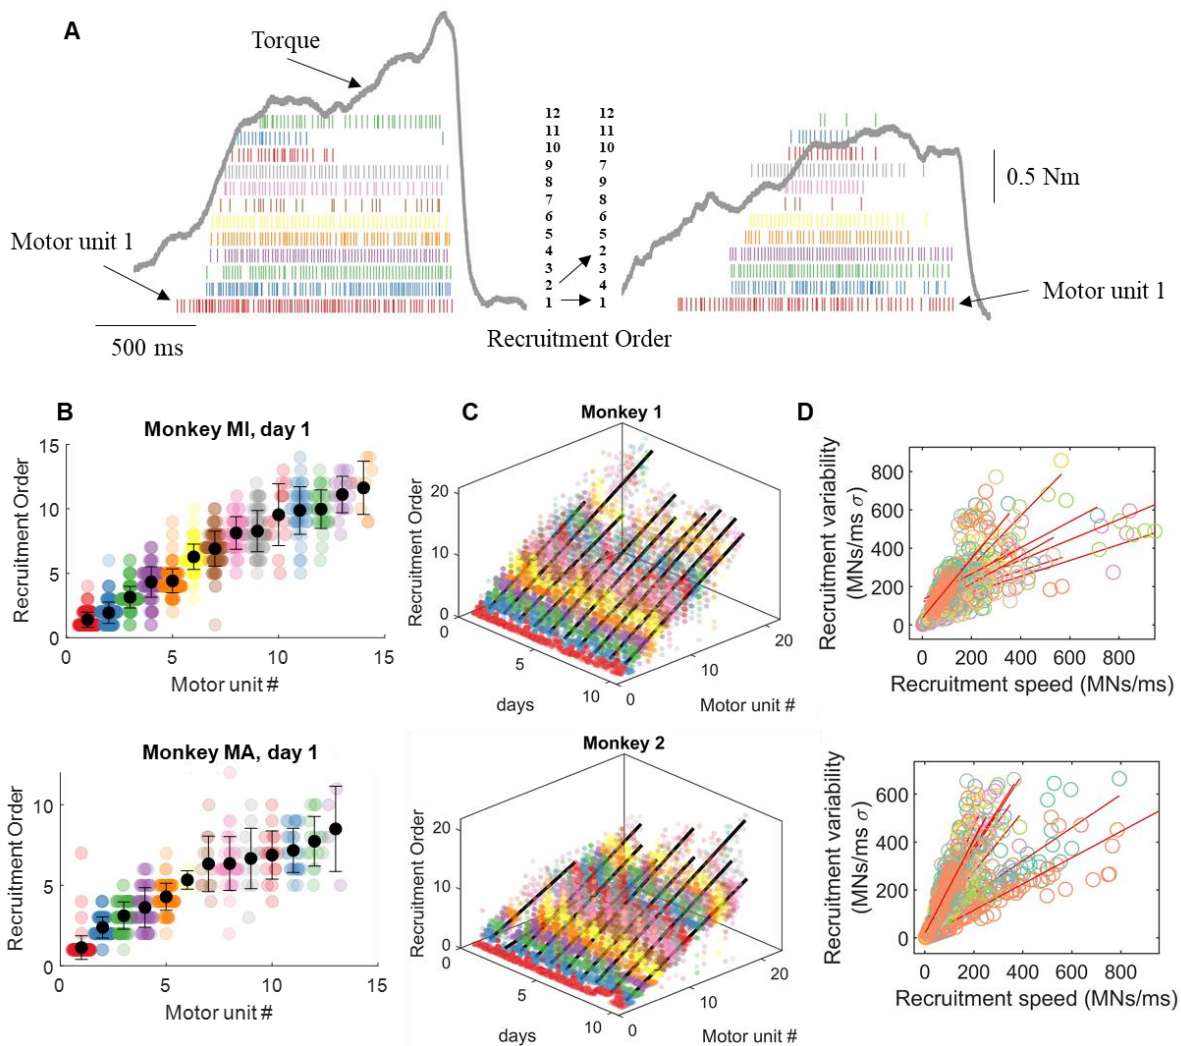

217

218 **Figure 4.** Motor unit recruitment thresholds and intervals across different contractions, motor units, and days. **A.**  
 219 For each motor unit we calculated the shifts in recruitment order with respect to the average recruitment threshold  
 220 of that unit. The motor units in the two contractions in **A** are color-coded with respect to the recruitment threshold  
 221 in the first contraction. For example, it is possible to observe the shift in the recruitment order of #2 to #4 in the  
 222 second contraction. However, these changes only happen for motor units with very similar threshold. For example,  
 223 the motor unit red (#1 in left panel) and the highest threshold motor unit (#12 green) shows a consistent recruitment  
 224 order. This can be well appreciated in the following figures when showing the motor unit recruitment order with  
 225 respect to the average across the specific day. **B.** Swarm-plots of the recruitment order across all motor units. We  
 226 first computed the recruitment threshold as the first spike of the motor unit during a specific contraction. We then  
 227 averaged the recruitment threshold across all contractions for the specific motor unit that was tracked across all  
 228 contractions (each dot in the swarm plot represents the recruitment threshold of a motor unit in an individual  
 229 contraction). The average recruitment threshold was then used to sort the recruitment interval of all motor units.  
 230 Note that each motor unit shows a stable behaviour across all contractions. **C.** Three-dimensional swarm plot for  
 231 all the motor units across the 10 days. For both monkeys the relationship between recruitment order and motor  
 232 unit number was linear across the 10 experimental sessions spaced over a month ( $R = 0.88 \pm 0.04$  for monkey MI  
 233 and  $R = 0.88 \pm 0.04$  for monkey MA,  $P < 0.00001$ ). **D.** The variability in recruitment order across days and  
 234 contractions was highly correlated with the recruitment speed of motoneurons. The recruitment speed of  
 235 motoneurons is an estimate of supraspinal drive and corresponds to the time derivative of the first discharge  
 236 timings of all motor units during an individual contraction. Each regression line in **D** shows the variability across  
 237 contractions for a specific day. Note the high variability in recruitment speed, which indicates the variance in rate  
 238 of force development across the contractions for a specific day.

239 The present results are in accordance with previous human and in-vitro experiments indicating that  
 240 motor units are recruited in a specific order. We therefore wanted to understand if there are specific  
 241 patterns in the motor unit discharge timings that control the recruitment and muscle force. We applied  
 242 a non-negative matrix factorization analysis (22) to the motor unit discharge timings. Because of the  
 243 large amount of motor unit data, we were able to discern the exact patterns common to all and to sub-  
 244 groups of motor units.

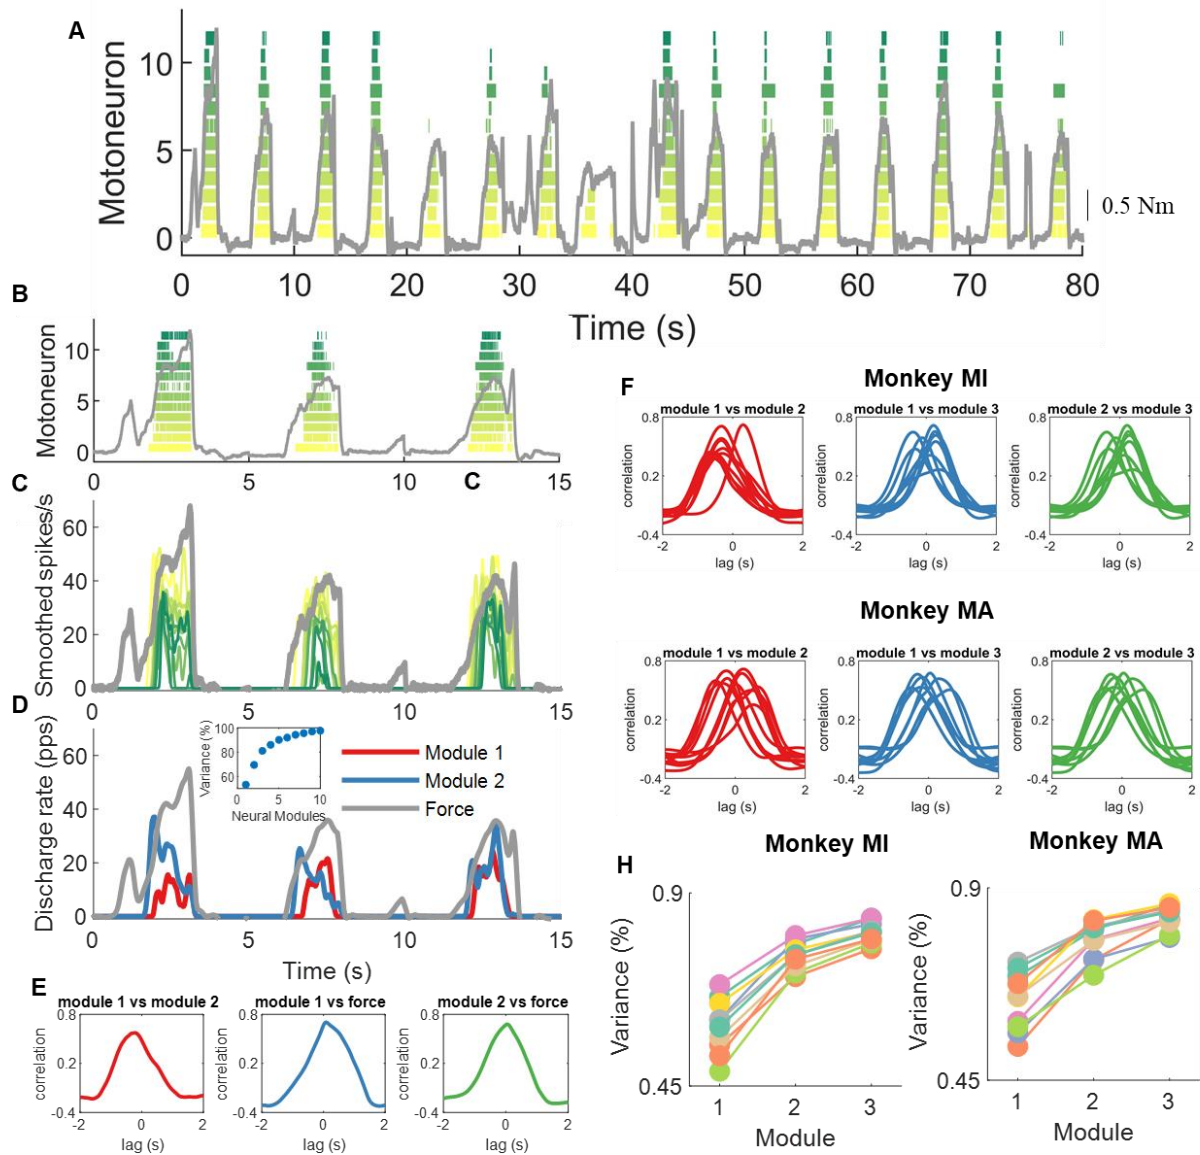

245

246 **Figure 5.** Encoding of muscle force by motor units. We aimed at decoding and encoding the temporal motor unit  
 247 information into components by non-negative matrix factorization. **A.** Raster plot of twelve motor units during a  
 248 subset of macaque voluntary isometric contractions (grey lines indicate the torque signal). Note the variability in  
 249 peak forces and rate of force developments. **B-C-D** show the first three contractions in **A.** **C.** The motor unit spike  
 250 trains in **A** were convoluted with a 2.5 Hz Hanning window. Note the high correlation between the motor unit  
 251 smoothed discharge rates and muscle force. **D.** We applied the reduction dimensionality technique non-negative  
 252 matrix factorization. We constrained the model to learn the components in the motor unit discharge rates up to 10  
 253 factors. In this example, the two modules that together explained approximately 80% of the variance are shown.  
 254 Note that these two modules are highly correlated, and time shifted. The inset in **D** shows the reconstruction  
 255 accuracy (variance %) of the neural modules with respect to the original signal (smoothed motor unit discharge  
 256 rates). **E.** We applied cross-correlation analysis between the modules and muscle force. This example shows the  
 257 correlation between the first module and second as well with voluntary force. The same method was then applied  
 258 for all modules in both monkeys, which are shown in **F.** Note the high correlation across all days and for both  
 259 monkeys. Moreover, there was always one module with a dominant component (the lag between the different

260 modules was never zero). This indicates that there is only one component constrained by the size principle, since  
261 the motor unit recruitment thresholds are highly preserved across all contractions **H**. The reconstruction accuracy  
262 (variance %) explained across the 10 days for both monkeys.

263 The non-negative matrix factorization revealed a principal component that explained ~50% of the  
264 variance. This component was present in the activity of virtually all low-thresholds motor units. There  
265 was a significant second factor that explained ~25% of the variance. Interestingly, this originated mainly  
266 from high threshold motor units and was an undistorted, time-shifted version of the first component.  
267 We then performed correlation analysis between all the components (10 in total, see Methods) and  
268 looked at the specific weight distributions across the individual motor unit recruitment thresholds. We  
269 found that these components were consistently time-shifted and with very high correlation values  
270 between each other (Figure 5F). Moreover, the second component was consistently present only in the  
271 high-threshold motor units. These results indicate that motor unit discharge rates during natural tasks  
272 in macaque monkeys are driven by one dominant command, which manifests in time-shifted form  
273 because of the progressive recruitment imposed by the size principle. Because the motoneuron is a non-  
274 linear system, the ensemble activity strongly indicates that these common fluctuations must originate  
275 from common input from cortical, afferents, or brainstem pathways. We provide strong evidence that a  
276 main component drives a pool of macaque brachioradialis motor units that is mediated by the  
277 recruitment order of the motor units.

## 278 Motor unit synchronization

279 It has been reported that the discharge timings of spinal motor units show very high synchronization  
280 values (2), which are associated with the generation of muscle force (23). Accordingly, we found high  
281 values of motor unit synchronization similar to what is typically observed in humans (24). We analysed  
282 synchronization in two frequency bandwidths; one which retains most of the information of the  
283 corticospinal pathways, 0-40 Hz (25), and a narrowed one (0-5 Hz), which retains the information that  
284 is correlated to force generation (corresponding to the muscle low-pass filtering bandwidth, <5Hz (26)).  
285 The cross-correlation value for the low pass filtered signals (5 Hz) at lag 0 was  $0.78 \pm 0.01$  and  $0.72 \pm$   
286  $0.10$  for MI and MA, respectively. The values across the different bandwidths were consistently very  
287 high. These values also showed very small deviations across the contractions (1.55% and 2.30% for MI  
288 and MA; see Figure 6). Interestingly, the value of synchronization was in the highest portion of the  
289 range observed in humans ( $R = 0.5 - 0.8$ ).

290

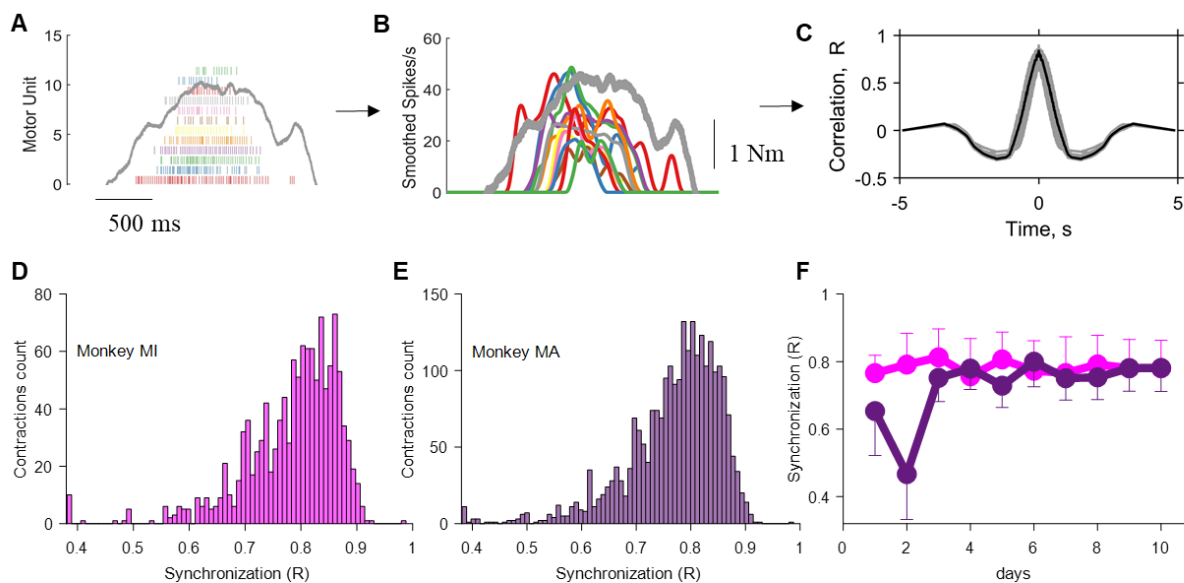

291

292 **Figure 6.** Motor unit synchronization across the different contractions for monkey MI and MA (color-coded). **A-**  
293 **C** Pipeline for the estimate of motor unit synchronization for an individual contraction. **A.** Raster plot of 12 motor  
294 units (grey indicates the torque with scale shown in panel B). **B.** The discharge timings of the motor units were

295 filtered with a Hanning window of 200 ms. **C.** The synchronization value was obtained by performing the cross-  
296 correlation function between two groups of randomly permuted groups of motor units (number of permutations  
297 = 100). Note that the synchronization value was relatively high, and comparable to what observed in humans  
298 during rapid force contractions. **D-E.** Histogram of the synchronization value across the individual contractions  
299 for both monkeys. **F.** The synchronization value was stable across the ten days (average and standard deviation  
300 for each days are shown). For Monkey 2 the first two days resulted in a lower synchronization value due to a  
301 lower number of identified motor units, as shown previously. Note that the small variability in synchronization  
302 value in D and E was fully explained by the instantaneous discharge rate of the motor units, as previously shown  
303 (24, 27).

304 The high correlation further indicates that the motoneurons likely received a strong common excitatory  
305 synaptic input and that this input was stable across days (Fig. 6F).

### 306 **Variability of motor commands are distributed within and between motor unit pools and have a** 307 **common supraspinal origin**

308 The previous results indicated that despite a large range of values in rate of force development and  
309 motor unit recruitment discharge characteristics, the general motor control scheme shows high  
310 reliability in the recruitment order and neural output of brachioradialis motor units. We also monitored  
311 the activity of other muscles involved in the tasks to verify behavioural variability across trials and  
312 days. We implanted 16 intramuscular EMG (iEMG) electrodes into the muscles of the left and right  
313 arm (Figure 7) and nerve cuffs around the median and radial nerves. The recordings from the iEMG  
314 signals were performed for the voluntary force contractions as well as for the involuntary stimulated  
315 contractions. We investigated the full bandwidth of efferent and afferent volleys with small changes of  
316 electric currents applied on the axon, until maximum efferent activation (M-wave).

317 The potentials evoked by electrical stimulation showed high reliability across days, with negligible  
318 deviations around the mean (Figure 7). This demonstrated stability of the recordings over days. On the  
319 other hand, the voluntary EMG amplitudes showed very high variability, with some muscles (including  
320 the brachioradialis) showing a 2-fold difference in maximal amplitude. This indicated relatively large  
321 variability in the way contractions were executed.

322 We then applied the same method for the identification of motor unit components (Fig. 5) to identify  
323 the neural modules within the muscles, as classically referred to as muscle synergies (28–30). We found  
324 one invariant neural component that explained more than 90% of the variance. This component was  
325 present either in the iEMG signals only from the trained limb, or in the combined iEMG signals from  
326 both limbs. This result further supports the role of a common input that is distributed between and within  
327 motor nuclei that is processed by the size principle and spinal cord circuitries, despite the large  
328 variability in the muscle activities.

329

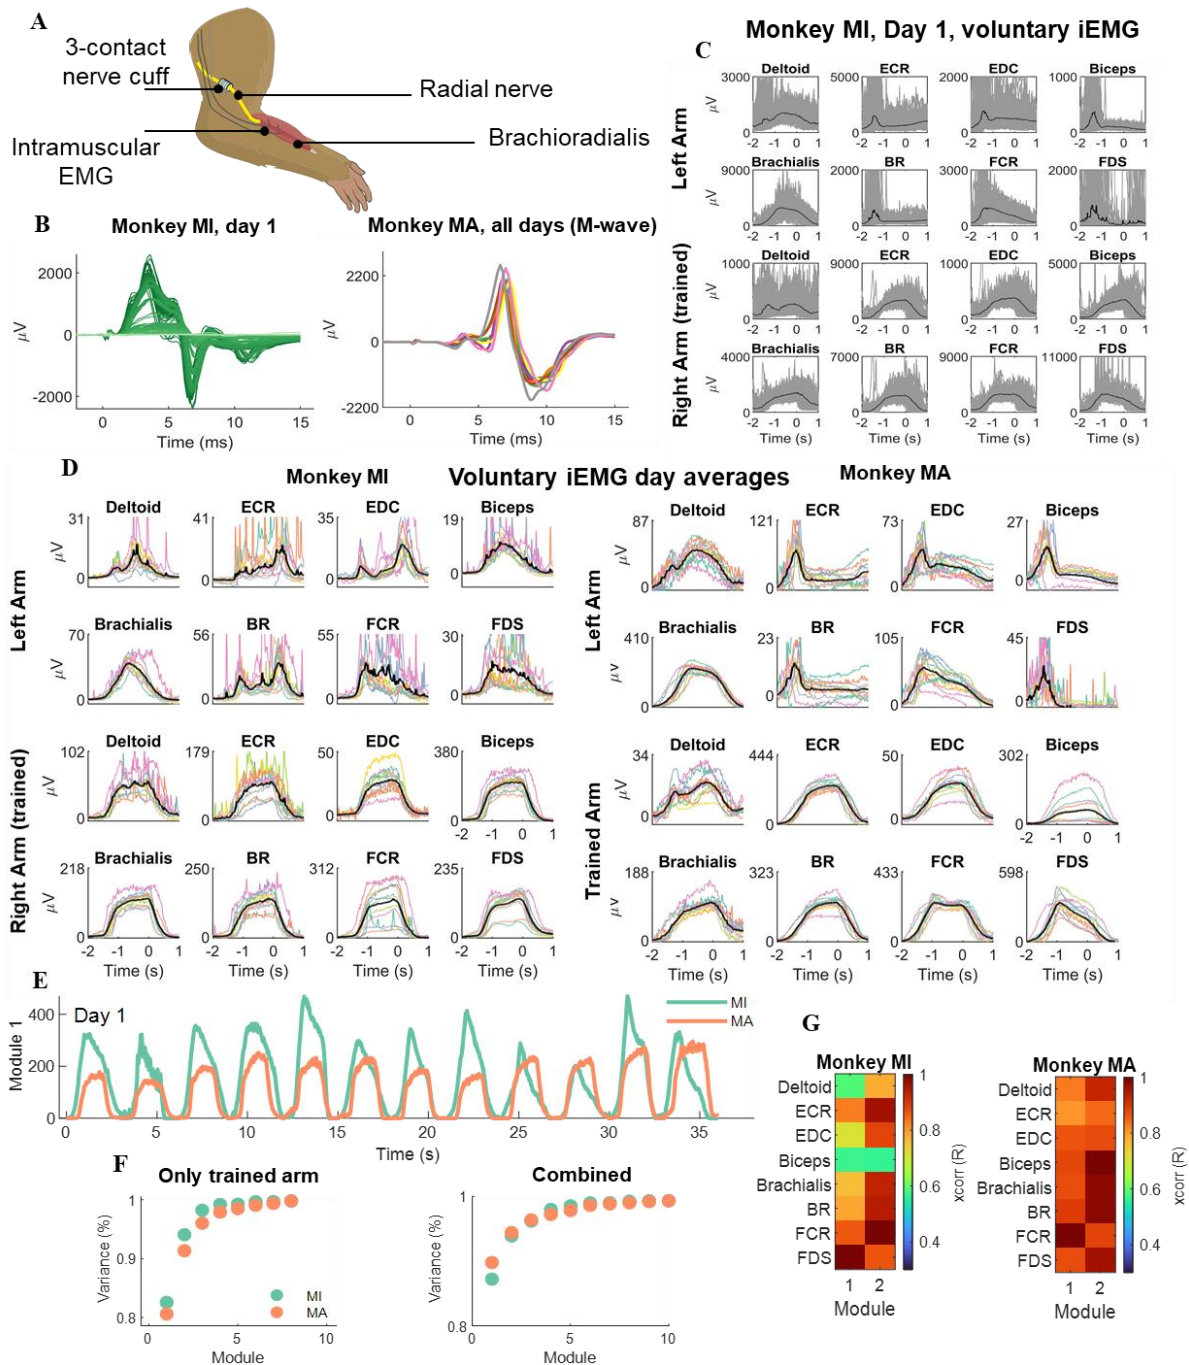

330

331 **Figure 7.** Neuromuscular implants in macaques. **A.** Both monkeys were implanted bilaterally with a nerve cuff  
 332 around the median and radial nerves. Implanted intramuscular EMG signals recorded the gross myoelectric  
 333 activity of 16 muscles bilaterally (8 muscles per side). **B.** During each experiment, the nerve cuff delivered  
 334 stimulation pulses at supramaximal intensity (M-waves) and ramped down in small decrements of  $0.1\mu\text{A}$ . The left  
 335 side of panel B (dark green lines) shows the iEMG recording sessions from supramaximal intensity to the smallest  
 336 (light green). On the right side of the panel twelve M-waves obtained during the different days (color-coded). **C.**  
 337 The iEMG signals from the voluntary contractions during one experimental session. Individual contractions as  
 338 well as the average (black line) are shown. Note the high intertrial variability in gross EMG responses. **D.** The  
 339 average iEMG traces across days (color-coded), for monkey MI and MA. **E.** Non-negative matrix factorization  
 340 analysis applied to the gross iEMG signals. The neural modules that explained most of the variance are shown for  
 341 each monkey. **F.** The reconstruction accuracy (variance %) of the components extracted by NMF. Note that one  
 342 component explained more than 80% of the variance. **G.** The cross-correlation of the first two modules for the  
 343 respective muscles.

344

## 345 **DISCUSSION**

346 We have proposed a new non-invasive method based on wearable sensors to monitor spinal  
347 motoneurons in non-human primates that surpasses previous invasive methods in terms of performance  
348 (number of motor units), accuracy, and the possibility to track units over time. With this method, we  
349 reveal an accurate representation of the strategies used by the nervous system to control motor units and  
350 muscle force. The condensed spatial dimensions given by the high-density grids allowed us to identify  
351 the same motor units in two macaque monkeys performing natural isometric contractions across several  
352 experimental sessions. The access to populations of spinal motor units and their longitudinal tracking  
353 provides a framework to study the changes in recruitment of spinal motoneurons and rate coding during  
354 natural tasks.

355 With respect to intramuscular recordings, these non-invasive approaches provide stable signals even  
356 during fast contractions (31), a greater number of decoded motor units (21), and the possibility to track  
357 the same motor units over multiple experimental sessions across days (32) and weeks (20). These  
358 approaches have been developed and extensively validated in humans (20, 21, 33). Here, for the first  
359 time, we show a non-invasive framework for decoding and longitudinally tracking relatively large  
360 populations of spinal motor neurons in behaving monkeys.

361 We found relatively high motor unit discharge rates in macaque monkeys ( $41.7 \pm 1.4$ ,  $38.4 \pm 2.0$   
362 spikes/s for MI and MA respectively across the ten days). These discharge rates were higher than  
363 those observed in isometric contractions at low and moderate forces in humans (<50 % of maximal  
364 voluntary force, <30 spikes/s) (33). Conversely, when related to fast human isometric contractions of  
365 the tibialis anterior muscle, the observed rates are similar (40.09 and 42.85 spikes/s, for the non-  
366 human and human motor units, respectively (31)).

367 The discharge timings of the motor units represent the neural code that generates muscle force.  
368 Recordings of motor unit activity during voluntary force contractions allow us to test the recruitment  
369 of motor units by the central nervous system in a detailed way, clarifying current debates in motor  
370 control. It has been debated for decades whether the common motoneuron fluctuations observed at the  
371 motor unit level are an epiphenomenon or have a functional origin. Similarly, the Henneman size  
372 principle has been constantly under investigation, due to the lack of in-vivo evidence with contractions  
373 at different rates of force development (6–9, 34, 35). These problems arise because of the lack of  
374 adequate methods.

375 Here we showed that the neural drive to the muscle is highly structured in a hierarchical fashion. We  
376 found strong associations between hierarchy and behaviour, so that for a given common input signal,  
377 the motoneurons behave synchronously once they reach their threshold to discharge, likely dictated by  
378 the intrinsic motoneuron properties. Our results are in strong accordance with simulations suggesting  
379 that the spinal cord decodes inputs from descending pathways by modulating the recruitment and  
380 derecruitment of motoneurons (36). The factorization analysis applied to individual motor unit  
381 discharge timings and gross intramuscular EMG signals from the trained and untrained limb, revealed  
382 that one component explained more than 80% of the variance. The motor unit findings revealed that  
383 this component is filtered by size principle. Our results demonstrate the interplay between common  
384 synaptic input and size principle.

385 In conclusion we presented a new non-invasive framework to decode populations of single spinal neural  
386 cells in macaque monkeys, which allows us to move from simple measures of behaviour (force) to the  
387 inputs that determine that behaviour. In addition to being non-invasive, this framework identifies the  
388 same motor units across months over the full force range. This is critical since inferring the patterns of  
389 motor behaviour by random sampling small population of active units may be inadequate (7, 11, 16, 17,  
390 37). We anticipate that this approach may find further utility when combined with invasive recordings  
391 of central motor circuits, which can provide direct access to the various putative sources of common  
392 drive (38–40).

## 393 **Materials and Methods**

## 394 **Animals**

395 Recordings were performed from two adult female awake behaving monkeys (*M. mulatta*; monkeys MI  
396 and MA, age 6, weight 6.2 and 6.7 kg respectively). All animal procedures were performed under  
397 appropriate licences issued by the UK Home Office in accordance with the Animals (Scientific  
398 Procedures) Act (1986) and were approved by the Animal Welfare and Ethical Review Board of  
399 Newcastle University.

## 400 **Behavioural Task**

401 The monkeys were trained to perform an isometric elbow flexion task with their right arm. Monkey  
402 MA was also trained to perform this task with her left arm. The forearm was placed into a rigid plastic  
403 cast. This was 3D printed from a digital model of the forearm made using a laser scanner (Go!Scan,  
404 Creaform 3D, Levis, Quebec, Canada), ensuring a close but comfortable fit. A further support held the  
405 upper arm; the supports were attached to the training cage to fix the elbow in 90° flexion, and the  
406 forearm in semi-pronation so that the radius and ulnar were oriented in a vertical plane. A load cell  
407 (LC703-25; OMEGA Engineering Inc., Norwalk, CT, USA) attached to the forearm cast registered  
408 elbow flexion torque. The force (kgF) applied to the load cell was recorded as a voltage signal by a  
409 custom designed task programme. A calibration factor was determined which allowed for the  
410 conversion of the voltage signal back into kilogram force (kgF) at a later stage. To determine the torque  
411 (N·m) produced by the animals, the recorded kilogram force was gravity corrected and converted into  
412 Newtons (N) and secondly multiplied by the distance between the load cell sensor and the elbow pivot  
413 joint (0.08m). The monkey initiated a trial by contracting elbow flexors to place the torque within a set  
414 window (1.648-3.295 N·m). This window was kept constant in all sessions and for both animals. The  
415 torque had to be held in this window for 1 s before releasing to obtain a food reward. Auditory cues  
416 were used to indicate to the monkey that the exerted force was within the required window, or else it  
417 was too high. Auditory feedback was also given to mark the end of the hold period. Recordings were  
418 collected from 10 sessions spanning 30 and 24 days for monkey MI and MA, respectively.

## 419 **Surgical Preparation**

420 After behavioural training was complete, monkey MI underwent a sterile implant surgery. After initial  
421 sedation with ketamine (10mg·kg<sup>-1</sup> IM), anaesthesia was induced with medetomidine (3 µg·kg<sup>-1</sup> IM)  
422 and midazolam (0.3mg·kg<sup>-1</sup> IM). The animal was then intubated and anaesthesia maintained using  
423 inhalation of sevoflurane (2.5-3.5% in 100% O<sub>2</sub>) and IV infusion of alfentanil (0.4 µg·kg<sup>-1</sup>·min<sup>-1</sup>).  
424 Methylprednisolone was infused to reduce oedema (5.4mg·kg<sup>-1</sup>·hr<sup>-1</sup> IV). Blood-oxygen saturation,  
425 heart rate, arterial blood pressure (using a non-invasive blood pressure cuff on the leg), core and  
426 peripheral temperature and end-tidal CO<sub>2</sub> were monitored throughout; ventilation was supported with a  
427 positive pressure ventilator. Hartmann's solution was infused to prevent dehydration (total infusion rate  
428 including drug solutions 5–10 ml·kg<sup>-1</sup>·h<sup>-1</sup>). Body temperature was maintained at 37°C using a  
429 thermostatically controlled heating blanket and also a source of warmed air. Intraoperative prophylactic  
430 antibiotics (cefotaxime 20mg·kg<sup>-1</sup> IV) and analgesia (carprofen 5 mg·kg<sup>-1</sup> SC) were given.

431 In monkey MI, nerve cuff electrodes (Microprobe, Gaithersburg, MD, USA) were implanted around  
432 the median and deep radial nerves bilaterally and secured with the integral sutures. Each cuff contained  
433 eight contacts, arranged as two sets of four wires placed radially around the inner circumference. A  
434 plastic headpiece (TECAPEEK MT CF30, Ensinger, Nufingen, Germany) was manufactured based on  
435 an MRI scan to fit the skull and fixed using ceramic bone screws (Thomas Recording Inc, Giessen,  
436 Germany) and dental acrylic. Intramuscular electrodes comprising Teflon-insulated stainless-steel  
437 wires were implanted in eight arm and forearm muscles bilaterally for gross electromyography (EMG)  
438 recording. Specifically, the muscles that were implanted with intramuscular electrodes corresponded  
439 to: deltoids, extensor carpi radialis (ECR), extensor digitorum communis (EDC), biceps brachii,  
440 brachialis, brachioradialis, flexor carpi radialis, and the flexor digitorum superficialis muscle (FD). The  
441 EMG and nerve cuff wires were tunnelled subcutaneously to connectors fixed to the headpiece. Nine  
442 weeks after monkey MI's first implant surgery, several wires connected to the deep radial nerve cuffs  
443 bilaterally were found to be broken, and stimulation through these cuffs was no longer possible.  
444 Replacement cuffs (with three contacts each, organised radially around the inner circumference) were

445 then implanted bilaterally on the radial nerve below the spiral groove in a further brief surgery, again  
446 with wires tunnelled subcutaneously to the head. Monkey MA underwent the implant surgery at a later  
447 stage to monkey MI and so was implanted with the same three contact cuffs around the median and  
448 radial nerves, along with EMG electrodes in the same muscles and fitted headpiece. All recordings were  
449 subsequently collected using the three contact nerve cuffs.

450 Post-operative care included a full programme of antibiotic (co-amoxiclav, dose as above) and  
451 analgesics (meloxicam, 0.2mg kg<sup>-1</sup> oral plus a single dose of buprenorphine 0.02mg kg<sup>-1</sup> IM).

#### 452 **Nerve cuff stimulation and recording**

453 Bipolar current pulses (0.2ms per phase) were delivered through the first and third contacts of the  
454 three contact radial cuffs with a bi-phasic constant current isolated stimulator (Model DS4, Digitimer,  
455 Hertfordshire, UK). Stimulus current was delivered at supramaximal intensity (0.45mA for monkey MI  
456 and 0.4mA for monkey MA) and ramped down in decrements of 0.1µA to threshold intensity. Left and  
457 right arms were stimulated in different sessions, following recordings of the motor task.

#### 458 **Electrophysiological Recordings**

459 Recordings were made from the brachioradialis muscle using a high-density surface EMG grids  
460 (GR04MMI305, OT Bioelettronica, Turin, Italy) with 64 electrodes (spacing 4mm). A bi-adhesive foam  
461 strip with holes aligned to the matrix was placed on the grid, and the holes filled with conductive paste  
462 (CC1, OT Bioelettronica, Turin, Italy). This assembly was then stuck to the skin over the muscle. To  
463 ensure good skin contact the forearm was shaved and cleansed with alcohol wipes. The location of the  
464 grid on the skin was marked each day with permanent marker pen to ensure reproducible placement  
465 from session to session. Standard surface adhesive electrodes (Neuroline 720; Ambu A/S, Ballerup,  
466 Denmark) were placed over the flexor and extensor tendons at the wrist to act as reference and ground;  
467 in the implanted animal (monkey MI), one of the unused nerve cuff electrodes was used as the ground.  
468 The surface grid electrode was connected to a custom printed circuit board containing a 64-channel  
469 amplifier (gain 192; bandwidth 30Hz - 2 kHz) and an analogue-to-digital convertor (RHD2164; Intan  
470 Technologies LLC, Los Angeles, CA, USA). Digitized signals were sent over a serial peripheral  
471 interface (SPI) cable to an RHD USB interface board (also Intan Technologies). This allowed data to  
472 be captured to a computer hard disc (5 kSamples/s) along with the elbow torque signal and digital  
473 markers signalling the phases of task performance and stimulus timing. Voluntary brachioradialis  
474 activity was recorded from the grid electrode during performance of the behavioural task (typically 100  
475 successful trials per session). Involuntary contractions were recorded by the intramuscular electrodes  
476 and the grid electrode during the radial nerve stimulation protocol.

#### 477 **Motor unit decomposition and analysis**

478 The high-density EMG recordings were offline digitally filtered with a 20-500 Hz Butterworth filter.  
479 Semi-automated MATLAB software extracted the area under the power spectrum and amplitude of  
480 each of the 64 channels and highlighted the channels with poor signal to noise ratio for visual inspection  
481 and exclusion from subsequent analysis. After this procedure, the monopolar signals were used for the  
482 decomposition. Identification of the individual motor unit firings was accomplished through a  
483 previously proposed algorithm (21), modified for these large datasets to use a graphical processing unit  
484 (GPU) running CUDA software (Nvidia Inc, Santa Clara, California, USA).

485 Briefly, this algorithm takes advantage of the unique two-dimensional spatiotemporal features of  
486 individual motor unit action potentials, to converge on an estimate of the motor unit spike trains. The  
487 decomposition blindly identifies the motor unit firings; only motor units with high silhouette-measure  
488 (>0.92 SIL) are initially maintained. SIL represents a qualitative measure of decomposition accuracy  
489 which is comparable to the pulse to noise ratio, ranging from 0 to 1, where 1 indicates perfect clustering  
490 of the motor unit action potential. The blind source separation procedure leverages the high spatial and  
491 temporal dimensionality of motor unit action potentials. This information is used to converge in an  
492 iterative way in the unique time-series representation of the firing times of the alpha motoneurons. We  
493 briefly describe here the general steps of decomposition. For a more detailed look into the details of



494 high density EMG decomposition, the technical and physiological details have been described  
495 previously (41, 42)

496 The EMG signal corresponds to the filtering of the motoneuron action potential by the muscle tissue  
497 with some added noise. Therefore, it is possible to represent in a mathematical form the signal that is  
498 carried by each channel of a multidimensional arrays of EMG signals. The EMG signal can be described  
499 as a convolution of the motoneuron discharge timings (sources) by the muscle tissue (muscle unit action  
500 potentials). The sources ( $s$ ) are the motoneuron axonal action potentials when reaching the muscle fibres  
501 and can be written as Dirac delta function.

$$502 \quad s_j(k) = \sum_r \delta(k - \varphi_{jr}) \quad (1)$$

503 where  $\varphi_{jr}$  represent the spike times of the  $j$ th motor unit. We can then write the EMG signal in a matrix  
504  $\underline{x}$  form (e.g., when recorded with multidimensional arrays such as the high-density EMG grids used in  
505 this study) as:

$$506 \quad \underline{x}(k) = \sum_{l=0}^{L-1} \underline{H}(l) \underline{s}(k-l) + \underline{n}(k) \quad (2)$$

507 where  $\underline{s}(k) = [s_1(k), s_2(k), \dots, s_n(k)]^T$  represent the  $n$  motor unit discharge times that generate the EMG  
508 signal ( $\underline{x}$ ) and  $\underline{n}$  is the noise to for each electrode. The matrix  $\underline{H}(l)$  in eq. 2 contains the spatial  
509 information of the motor unit action potential and has size  $m \times l$  with  $l$ th sample of motor unit action  
510 potentials for the  $n$  motor units and  $m$  channels (two-dimensional format, hereafter referred to 2D motor  
511 unit waveform). The high spatial sampling given by the 64 electrodes further enhanced by extending  
512 the observation numbers (41) allows the recovery of the sources in an iterative blind way with a function  
513 that maximizes the sparsity between each motor unit action potential (Fig. 1A). This process is obtained  
514 in a fully automatic and blind way; therefore, we can inspect the validity of decomposition by spike-  
515 triggered averaging. With spike-trigger averaging it is also possible to retrieve by correlation analysis  
516 the information that is carried by the action potential ( $\underline{H}$ ) in different days, in a fully automatic way. By  
517 using 2D correlation analysis it indeed possible track motor unit waveform across weeks (32) and even  
518 months (24). The motor unit tracking uses the information carried in  $\underline{H}$  to compare across sessions the  
519 two dimensional cross-correlations across all possible combinations of motor unit action potentials. The  
520 two-dimensional cross-correlation (2D correlation hereafter) is comparable to a one-dimensional cross-  
521 correlation, but with a weighted average across the time-space features of the motor unit waveforms  
522 (see Figure 1). The output of the two-dimensional cross-correlation ranges from 0 to 1, where 1 indicate  
523 maximal similarity. For example, two randomly-selected motor units have a two-dimensional cross-  
524 correlation lower than 0.3 (20).

## 525 **Motor unit characteristics**

526 We first displayed all motor units 2D correlation values with  $R > 0.55$  and with a total number of  
527 discharge timings (impulses)  $> 100$  and visually inspected the waveforms for potential errors. The  
528 unique combinations of motor unit waveform that were preserved after this visual inspection stage had  
529  $R > 0.70$ . From all the retained motor units, we computed the instantaneous discharge rate (inverse of the  
530 inter-spike interval) averaged across the hold period for all trials of the task on a given day.  
531 Synchronization of the motor unit pool was also assessed, as the magnitude of the cross-correlation  
532 between two equally sized groups of motor unit spike trains. The number of motor units in each group  
533 was randomly assigned for a total of 100 permutations. For each iteration two random unique subsets  
534 of units were selected for each group (each group being half of the total number of the identified units  
535 during a specific contraction). The spike trains (binary signals) for each motor unit group were then  
536 summed and smoothed using a Hann window with two corner frequencies of 40 Hz and 2.5 Hz. We  
537 chose two Hann window because this cut-off retains most of the oscillatory activity of the motoneuron  
538 pool (40 Hz) and the low frequency is mainly associated to the neural drive that is responsible for force  
539 production (i.e., the correlation between a force signal and the low pass filtered motor unit discharge  
540 timings is minimally distorted by the musculotendinous unit).

541 For the motor unit recruitment threshold estimates, we first looked at the recruitment order (in seconds)  
542 of the motor unit during the individual contractions. This was estimated by taking the time point when  
543 that unit was active for the first time. We then calculated the average recruitment threshold (in seconds)  
544 for all units across all contractions. Afterwards, we labelled each unit from 1 to the maximum number  
545 of identified units in a specific contraction (i.e., a motor unit takes the value of 1 if it is the first  
546 recruited). Then we plotted the recruitment thresholds for each specific unit across all contractions.  
547 Because the labelling is not dependent on the average, if there is a correlation between the average  
548 recruitment threshold and the binarized recruitment threshold across all contractions, this relationship  
549 indicates the amount of flexibility in recruitment order obtained by the nervous system in a direct way.

550 We then computed the derivative of the recruitment of the motor units. After calculating the recruitment  
551 thresholds (in seconds) of all the motor units in each contraction, the recruitment threshold was sorted  
552 from the smallest to the largest and we computed the derivative of this vector. The derivative of this  
553 vector corresponds to the number of motor units recruited per seconds, which is an estimate of the  
554 efferent drive received by the population of motor units, i.e., a faster recruitment speed of motoneurons  
555 results in a faster rate of force development (31, 43). We then associated for each contraction the  
556 variability in recruitment order, that was calculated as the standard deviation of the binarized  
557 recruitment thresholds versus the motor unit recruitment speed (the first derivative of the recruitment  
558 thresholds). If there would be an association between these two variables it would indicate that a faster  
559 recruitment (which could be due to higher synaptic input) is associated with a violation in the  
560 recruitment order.

#### 561 **Factorization of motor unit activities**

562 We factorized the motor unit discharge timings with a non-negative matrix factorization method  
563 (NNMF, 29). This method can learn specific features in 2D images such human face characteristics or  
564 semantic properties of a written text with the use of linear algebra. In the context of neural signals, we  
565 constrained this method to learn the unique components in the motor unit discharge rates that are  
566 responsible for force production. Figure 6 shows the overall architecture for this analysis.

567 The force level developed by a muscle is driven by the number of motor unit activation signals, which  
568 can be represented as time sequences of  $M$  dimensional vectors, that correspond to the activation of the  
569 motoneurons  $\mathbf{m}(t)$  in response to common and independent synaptic inputs arising from afferent and  
570 efferent volleys. Therefore, we can express the motoneuron behaviour as combinations of  $N$  varying  
571 synaptic inputs which construct a specific motor unit firing characteristic, or *neural module*, expressed  
572 as  $\{w_i(t)\}_{i=1,\dots,N}$

$$573 \quad m(t) = \sum_{i=1}^N c_i w_i$$

574 where  $c_i$  is a non-negative scaling coefficient of the  $i$ -th neural module. We are interested in finding the  
575  $w_i$  vectors within the low-frequency motor unit discharge rates. Because motor unit firing rates are non-  
576 negative, we can utilize NNMF (22) to constrain  $w_i$  to be non-negative. This procedure maximizes the  
577 interpretability of the data since the representation of the neural motor unit ensemble only includes  
578 additive and not subtractive combinations, therefore having an output module with the same scale as  
579 the input signal. NNMF iteratively finds the non-negative factors  $\mathbf{W}$  and  $\mathbf{H}$  with an interactive procedure  
580 that minimize the residuals between  $\mathbf{D}$  (the sources) and  $\mathbf{W}^*\mathbf{H}$ . So that  $\mathbf{W}^*\mathbf{H}$  is a lower-rank  
581 approximation of the firings of the individual motor units ( $\mathbf{D}$ ). The firing of the individual motor units  
582 are stored in a matrix with rows equal to the number of identified motor units and with columns having  
583 the duration of the recording. The motor unit are initially stored as Dirac delta's function  $\delta(k - \varphi_{jr})$ ,  
584 and then low pass filtered at 2.5 Hz (Figure 6). NNMF is an iterative algorithm that starts with random  
585 initial value of  $\mathbf{W}$  and  $\mathbf{H}$ . Because the root mean square of  $\mathbf{D}$  can have local minima, we performed up  
586 to 1000 iterations to converge to a representative reconstruction of  $\mathbf{D} = \mathbf{W}^*\mathbf{H}$ .

587 We then evaluated the output of NNMF with different decoding-encoding functions. First, we  
588 constrained the number of factors number equal to the number of identified motor units across a specific

589 day. After this initial procedure, we consistently found that >10 factor explained 99% of the variance.  
590 The reconstruction accuracy (residual variance or variance explained) was calculated by computing the  
591 residuals ( $D - W*H$ ) and then computing the deviation from the mean ( $R^2$ ). Second, we evaluated the  
592 decomposition by looking at the decoding-encoding of the individual neurons with the respect to the  
593 matrix  $W$ . This analysis was computed by performing the cross-correlation between the low-pass  
594 filtered motor unit discharge rates ( $D$ ) and the individual neural modules ( $W$ ) extracted by NNMF. The  
595 same method was applied on the gross EMG signals from the intramuscular electrode. After  
596 rectification and averaging, the average EMG signals for each day were processed by NNMF and the  
597 residual variance was calculated in the same way for the motor units (Figure 7 shows the results and  
598 analysis of the intramuscular EMG signals). All of the analyses were performed in MATLAB.

## 599 Funding

600 Supported by a grant from The William Leech Charity. JI received the support from "la Caixa"  
601 Foundation (ID 100010434; fellowship code LCF/BQ/PI21/11830018).

602

## 603 References

- 604 1. A. A. Faisal, L. P. J. Selen, D. M. Wolpert, Noise in the nervous system. *Nat. Rev. Neurosci.* **9**,  
605 292–303 (2008).
- 606 2. C. J. De Luca, Z. Erim, Common drive of motor units in regulation of muscle force. *Trends*  
607 *Neurosci.* **17**, 299–305 (1994).
- 608 3. E. R. Kandel, J. H. Schwartz, T. M. Jessell, *Principles of Neural Science, fourth addition*  
609 (2000), vol. 4.
- 610 4. E. D. Adrian, D. W. Bronk, The discharge of impulses in motor nerve fibres: Part II. The  
611 frequency of discharge in reflex and voluntary contractions. *J. Physiol.* **67**, i3–i151 (1929).
- 612 5. E. Henneman, Relation between size of neurons and their susceptibility to discharge. *Science.*  
613 **126**, 1345–7 (1957).
- 614 6. J. Duchateau, R. M. Enoka, Human motor unit recordings: Origins and insight into the  
615 integrated motor system. *Brain Res.* **1409**, 42–61 (2011).
- 616 7. N. J. Marshall, J. I. Glaser, E. M. Trautmann, E. A. Amematsro, S. M. Perkins, M. N. Shadlen,  
617 L. F. Abbott, J. P. Cunningham, M. M. Churchland, *bioRxiv*, in press (available at  
618 <https://doi.org/10.1101/2021.05.05.442653>).
- 619 8. J. V. Basmajian, Control and Training of Individual Motor Units. *Science (80-. )*. **141**, 440–  
620 441 (1963).
- 621 9. V. F. HARRISON, O. A. MORTENSEN, Identification and voluntary control of single motor  
622 unit activity in the tibialis anterior muscle. *Anat. Rec.* **144**, 109–16 (1962).
- 623 10. J. E. Desmedt, E. Godaux, Fast motor units are not preferentially activated in rapid voluntary  
624 contractions in man. *Nature.* **267**, 717–9 (1977).
- 625 11. H. S. Milner-Brown, R. B. Stein, R. Yemm, The contractile properties of human motor units  
626 during voluntary isometric contractions. *J. Physiol.* **228**, 285–306 (1973).
- 627 12. M. A. Nordstrom, A. J. Fuglevand, R. M. Enoka, Estimating the strength of common input to  
628 human motoneurons from the cross-correlogram. *J. Physiol.* **453**, 547–74 (1992).
- 629 13. D. Farina, F. Negro, J. L. Dideriksen, The effective neural drive to muscles is the common  
630 synaptic input to motor neurons. *J. Physiol.* **49**, 1–37 (2014).
- 631 14. S. N. Baker, J. M. Kilner, E. M. Pinches, R. N. Lemon, The role of synchrony and oscillations

- 632 in the motor output. *Exp. Brain Res.* **128**, 109–117 (1999).
- 633 15. H. S. Milner-Brown, R. B. Stein, R. Yemm, Changes in firing rate of human motor units  
634 during linearly changing voluntary contractions. *J. Physiol.* **230**, 371–90 (1973).
- 635 16. R. N. Lemon, G. W. H. Mantel, P. A. Rea, Recording and identification of single motor units  
636 in the free-to-move primate hand. *Exp. brain Res.* **81**, 95–106 (1990).
- 637 17. G. W. H. Mantel, R. N. Lemon, Cross-correlation reveals facilitation of single motor units in  
638 thenar muscles by single corticospinal neurones in the conscious monkey. *Neurosci. Lett.* **77**,  
639 113–118 (1987).
- 640 18. E. Olivier, S. N. Baker, K. Nakajima, T. Brochier, R. N. Lemon, Investigation into non-  
641 monosynaptic corticospinal excitation of macaque upper limb single motor units. *J.*  
642 *Neurophysiol.* **86**, 1573–1586 (2001).
- 643 19. A. Del Vecchio, F. Sylos-Labini, V. Mondì, P. Paolillo, Y. Ivanenko, F. Lacquaniti, D. Farina,  
644 Spinal motoneurons of the human newborn are highly synchronized during leg movements.  
645 *Sci. Adv.* **6**, eabc3916 (2020).
- 646 20. A. Del Vecchio, D. Farina, Interfacing the neural output of the spinal cord: robust and reliable  
647 longitudinal identification of motor neurons in humans. *J. Neural Eng.* **17**, 016003 (2019).
- 648 21. F. Negro, S. Muceli, A. M. Castronovo, A. Holobar, D. Farina, Multi-channel intramuscular  
649 and surface EMG decomposition by convolutive blind source separation. *J. Neural Eng.* **13**,  
650 026027 (2016).
- 651 22. D. D. Lee, H. S. Seung, Learning the parts of objects by non-negative matrix factorization.  
652 *Nature.* **401**, 788–791 (1999).
- 653 23. D. F. Feeney, D. Mani, R. M. Enoka, Variability in common synaptic input to motor neurons  
654 modulates both force steadiness and pegboard time in young and older adults. *J. Physiol.* **596**,  
655 3793–3806 (2018).
- 656 24. A. Del Vecchio, D. Falla, F. Felici, D. Farina, The relative strength of common synaptic input  
657 to motor neurons is not a determinant of the maximal rate of force development in humans. *J.*  
658 *Appl. Physiol.* **127**, 205–214 (2019).
- 659 25. S. N. Baker, E. M. Pinches, R. N. Lemon, Synchronization in Monkey Motor Cortex During a  
660 Precision Grip Task. II. Effect of Oscillatory Activity on Corticospinal Output. *J.*  
661 *Neurophysiol.* **89**, 1941–1953 (2003).
- 662 26. F. Baldissera, P. Cavallari, G. Cerri, Motoneuronal pre-compensation for the low-pass filter  
663 characteristics of muscle. A quantitative appraisal in cat muscle units. *J. Physiol.* **511**, 611–627  
664 (1998).
- 665 27. J. de la Rocha, B. Doiron, E. Shea-Brown, K. Josić, A. D. Reyes, Correlation between neural  
666 spike trains increases with firing rate. *Nature.* **448**, 802–6 (2007).
- 667 28. A. D’Avella, P. Saltiel, E. Bizzi, Combinations of muscle synergies in the construction of a  
668 natural motor behavior. *Nat. Neurosci.* **6**, 300–308 (2003).
- 669 29. M. C. Tresch, C. C. K. V., A. d’Avella, Matrix Factorization Algorithms for the Identification  
670 of Muscle Synergies: Evaluation on Simulated and Experimental Data Sets. *J. Neurophysiol.*  
671 **95**, 2199–2212 (2005).
- 672 30. Y. P. Ivanenko, R. E. Poppele, F. Lacquaniti, Five basic muscle activation patterns account for  
673 muscle activity during human locomotion. *J. Physiol.* **556**, 267–282 (2004).
- 674 31. A. Del Vecchio, F. Negro, A. Holobar, A. Casolo, J. P. Folland, F. Felici, D. Farina, You are  
675 as fast as your motor neurons: speed of recruitment and maximal discharge of motor neurons

- 676 determine the maximal rate of force development in humans. *J. Physiol.* **597**, 2445–2456  
677 (2019).
- 678 32. E. Martinez-Valdes, F. Negro, C. M. Laine, D. Falla, F. Mayer, D. Farina, Tracking motor  
679 units longitudinally across experimental sessions with high-density surface electromyography.  
680 *J. Physiol.* **595**, 1479–1496 (2017).
- 681 33. A. Del Vecchio, A. Casolo, F. Negro, M. Scorcelletti, I. Bazzucchi, R. Enoka, F. Felici, D.  
682 Farina, The increase in muscle force after 4 weeks of strength training is mediated by  
683 adaptations in motor unit recruitment and rate coding. *J. Physiol.* **597**, 1873–1887 (2019).
- 684 34. J. C. Dean, J. M. Clair-Auger, O. Lagerquist, D. F. Collins, Asynchronous recruitment of low-  
685 threshold motor units during repetitive, low-current stimulation of the human tibial nerve.  
686 *Front. Hum. Neurosci.* **8**, 1002 (2014).
- 687 35. J. A. Stephens, R. Garnett, N. P. Buller, Reversal of recruitment order of single motor units  
688 produced by cutaneous stimulation during voluntary muscle contraction in man. *Nature.* **272**  
689 (1978), pp. 362–364.
- 690 36. R. N. Watanabe, A. F. Kohn, Fast Oscillatory Commands from the Motor Cortex Can Be  
691 Decoded by the Spinal Cord for Force Control. *J Neurosci.* **35**, 13687–13697 (2015).
- 692 37. S. S. M. Lee, M. de Boef Miara, A. S. Arnold, A. A. Biewener, J. M. Wakeling, EMG analysis  
693 tuned for determining the timing and level of activation in different motor units. *J.*  
694 *Electromyogr. Kinesiol.* **21**, 557–565 (2011).
- 695 38. D. S. Soteropoulos, E. R. Williams, S. N. Baker, Cells in the monkey ponto-medullary  
696 reticular formation modulate their activity with slow finger movements. *J. Physiol.* **590**, 4011–  
697 4027 (2012).
- 698 39. C. L. Witham, M. Wang, S. N. Baker, Cells in somatosensory areas show synchrony with beta  
699 oscillations in monkey motor cortex. *Eur. J. Neurosci.* **26**, 2677–2686 (2007).
- 700 40. E. R. Williams, D. S. Soteropoulos, S. N. Baker, Spinal interneuron circuits reduce  
701 approximately 10-Hz movement discontinuities by phase cancellation. *Proc. Natl. Acad. Sci.*  
702 *U. S. A.* **107**, 11098–11103 (2010).
- 703 41. D. Farina, A. Holobar, Characterization of Human Motor Units from Surface EMG  
704 Decomposition. *Proc. IEEE.* **104**, 353–373 (2016).
- 705 42. A. Del Vecchio, A. Holobar, D. Falla, F. Felici, R. M. Enoka, D. Farina, Tutorial: Analysis of  
706 motor unit discharge characteristics from high-density surface EMG signals. *J. Electromyogr.*  
707 *Kinesiol.* **53**, 102426 (2020).
- 708 43. J. L. Dideriksen, A. Del Vecchio, D. Farina, Neural and muscular determinants of maximal  
709 rate of force development. *J. Neurophysiol.* **123**, 149–157 (2020).
- 710
